# Supplementary material for: Functional Analysis of Genes GlaDFR1 and GlaDFR2 Encoding Dihydroflavonol 4‐Reductase (DFR) in Gentiana lutea L. Var. Aurantiaca (M. Laínz) M. Laínz
Source: Hindawi journal article supplement (doi:10.1155/2022/1382604), 2022-01-01

**Figure S1.** Identification of the flavonol metabolites based on HPLC-MS analysis (360 nm) in wild type (WT) and transgenic tobacco plants with overexpression of *GlaDFR1* and *GlaDFR2*.

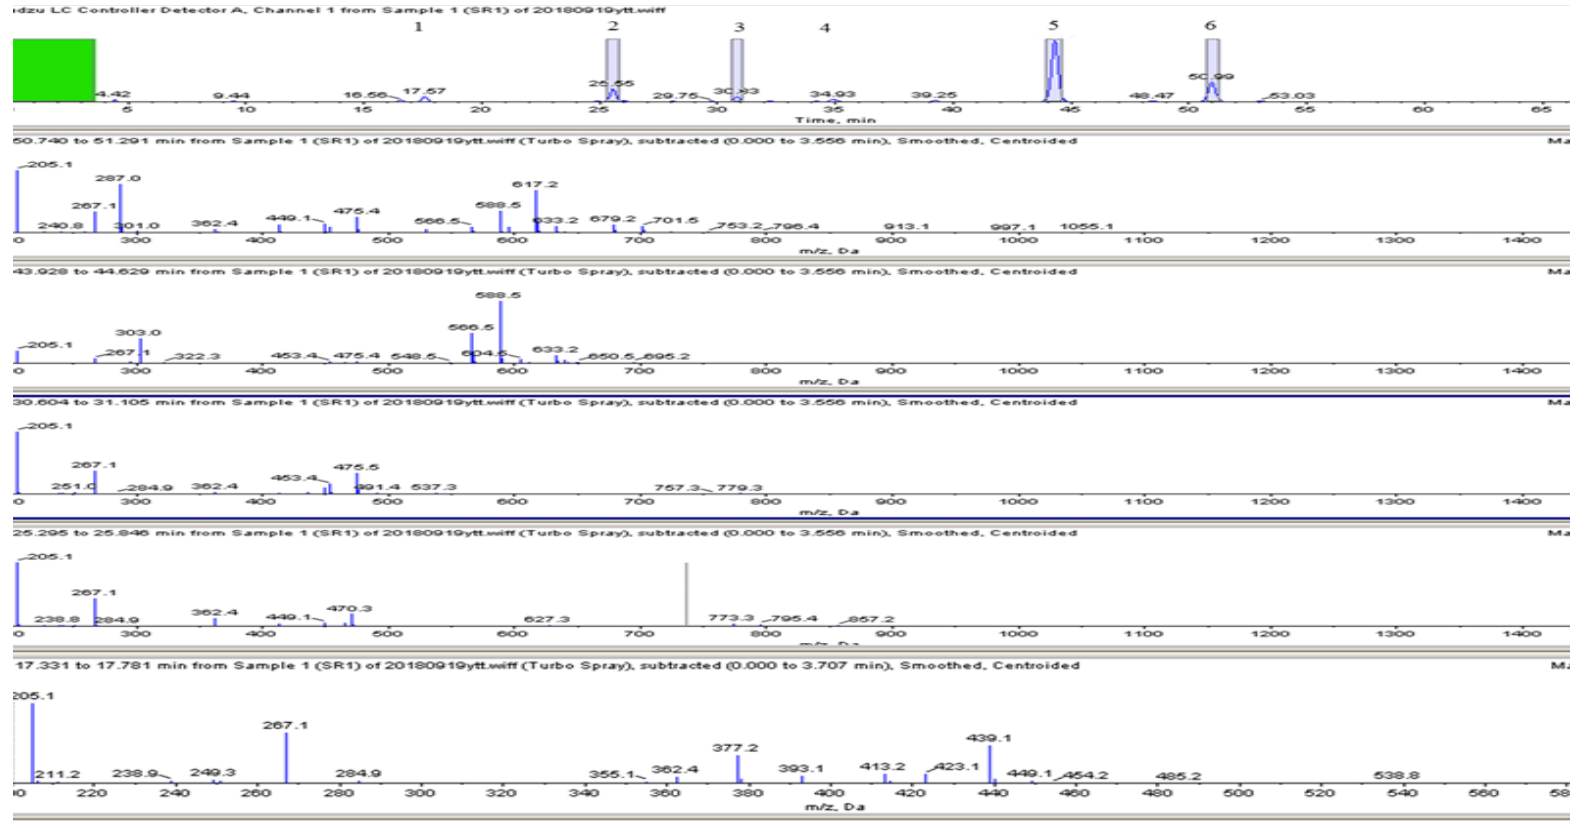

adzu LC Controller Detector A, Channel 1 from Sample 2 (1-3) of 20180919ytt.wiff

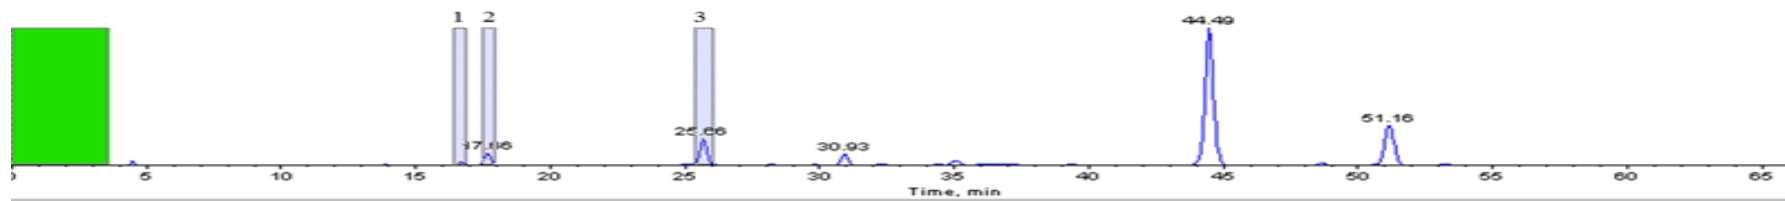

25.345 to 26.046 min from Sample 2 (1-3) of 20180919ytt.wiff (Turbo Spray), subtracted (0.000 to 3.556 min), Smoothed, Centroided

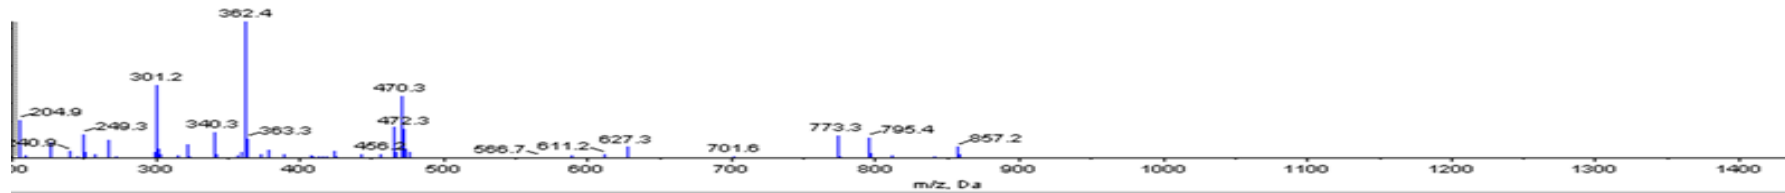

17.481 to 17.982 min from Sample 2 (1-3) of 20180919ytt.wiff (Turbo Spray), subtracted (0.000 to 3.556 min), Smoothed, Centroided

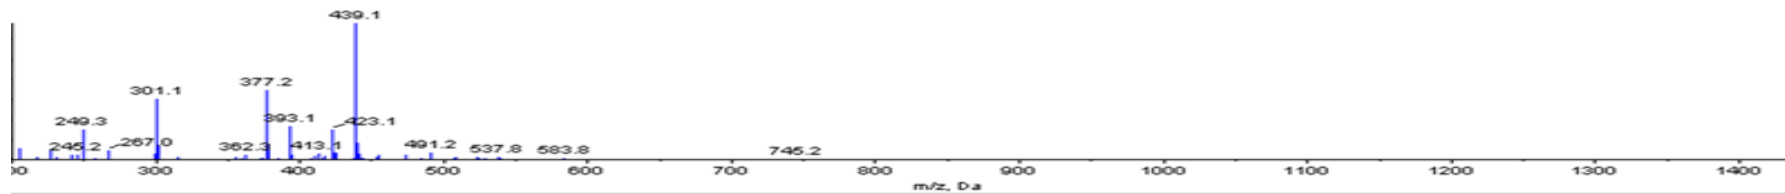

16.379 to 16.880 min from Sample 2 (1-3) of 20180919ytt.wiff (Turbo Spray), subtracted (0.000 to 3.556 min), Smoothed, Centroided

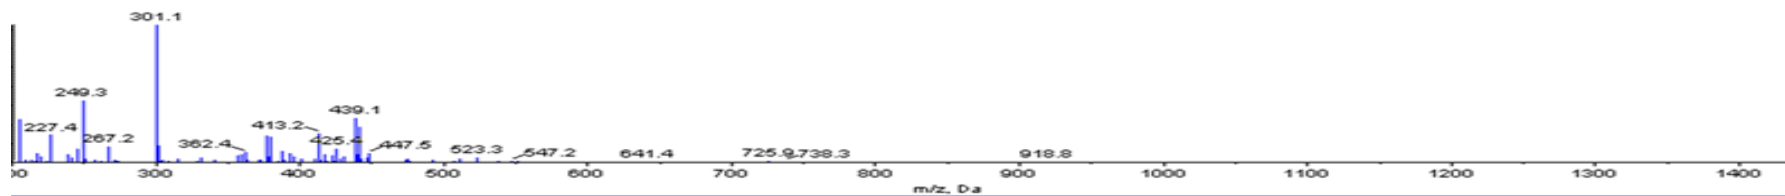

idzu LC Controller Detector A, Channel 1 from Sample 2 (1-3) of 20180919ytt.wiff

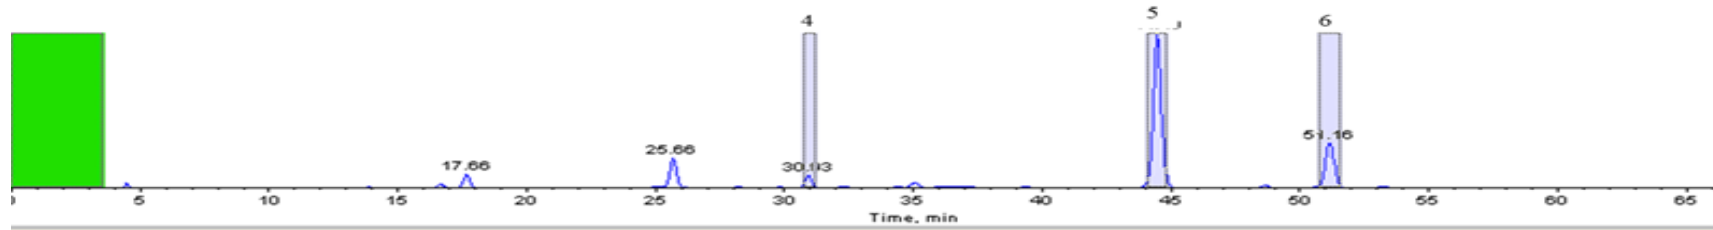

50.740 to 51.591 min from Sample 2 (1-3) of 20180919ytt.wiff (Turbo Spray), subtracted (0.000 to 3.556 min), Smoothed, Centroided Max

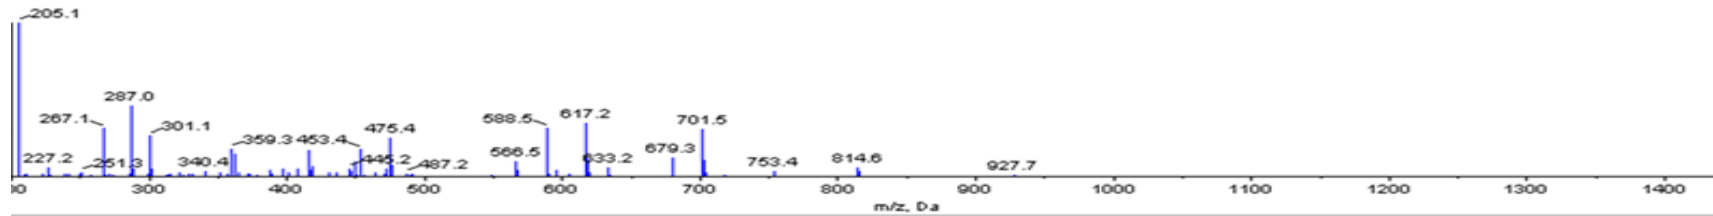

44.078 to 44.829 min from Sample 2 (1-3) of 20180919ytt.wiff (Turbo Spray), subtracted (0.000 to 3.556 min), Smoothed, Centroided Max

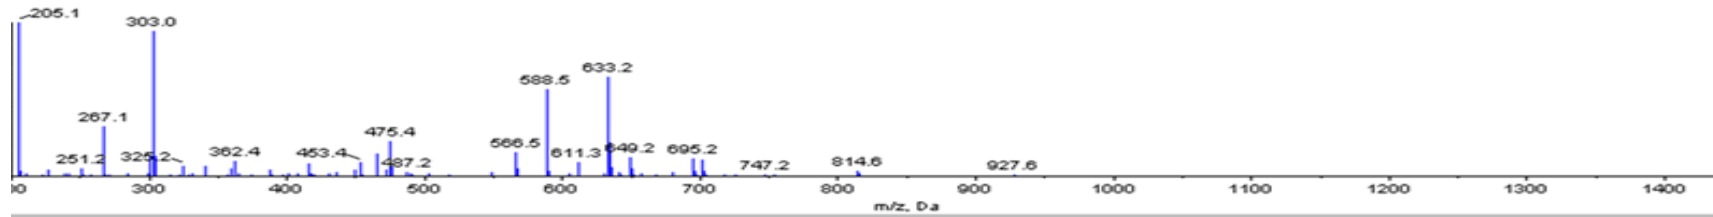

30.754 to 31.255 min from Sample 2 (1-3) of 20180919ytt.wiff (Turbo Spray), subtracted (0.000 to 3.556 min), Smoothed, Centroided Max

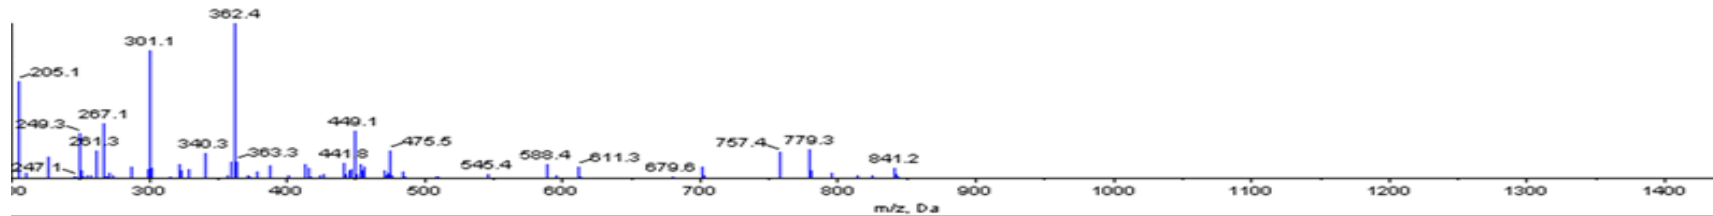

Idzu LC Controller Detector A, Channel 1 from Sample 4 (1-9) of 20180919ytt.wiff

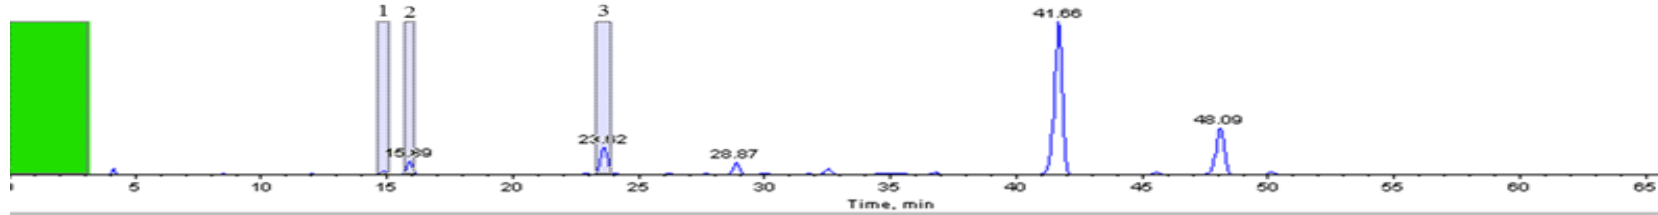

23.291 to 23.892 min from Sample 4 (1-9) of 20180919ytt.wiff (Turbo Spray), subtracted (0.000 to 3.156 min), Smoothed, Centroided

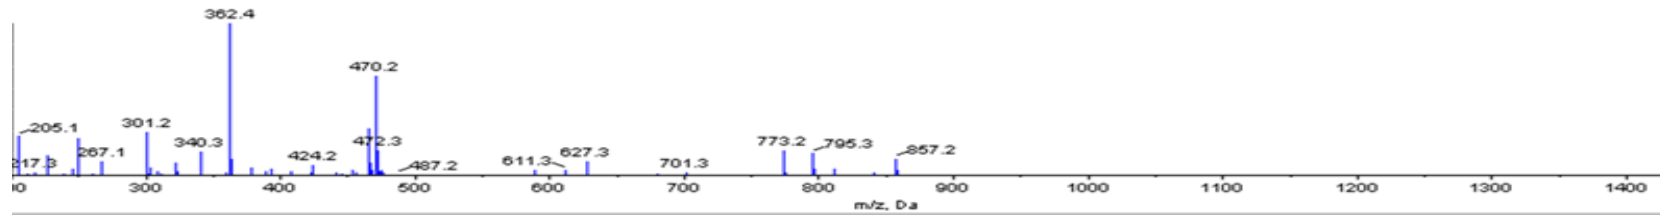

15.678 to 16.128 min from Sample 4 (1-9) of 20180919ytt.wiff (Turbo Spray), subtracted (0.000 to 3.156 min), Smoothed, Centroided

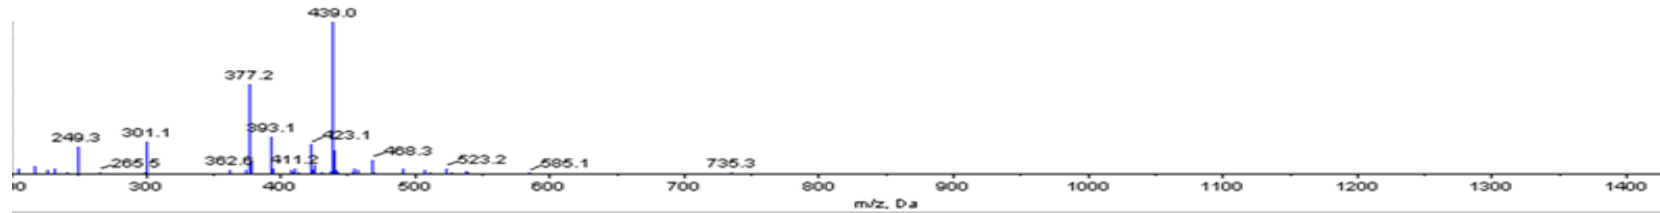

14.576 to 15.077 min from Sample 4 (1-9) of 20180919ytt.wiff (Turbo Spray), subtracted (0.000 to 3.156 min), Smoothed, Centroided

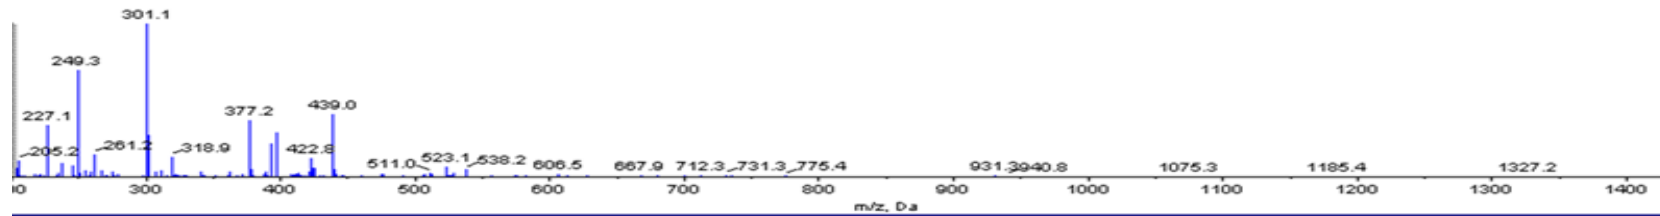

idzu LC Controller Detector A, Channel 1 from Sample 4 (1-9) of 20180919ytt.wiff

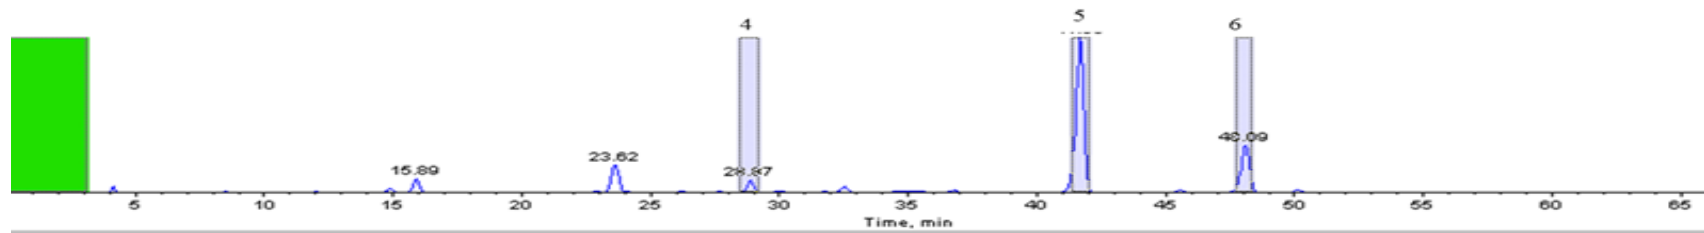

47.734 to 48.385 min from Sample 4 (1-9) of 20180919ytt.wiff (Turbo Spray), subtracted (0.000 to 3.156 min), Smoothed, Centroided

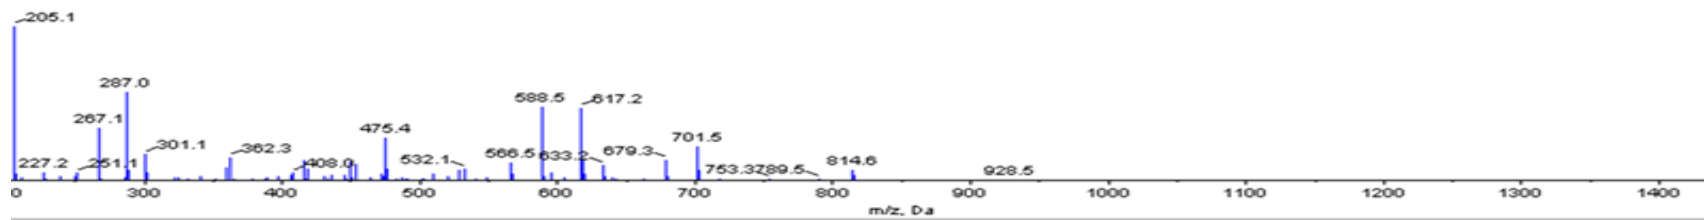

41.323 to 42.074 min from Sample 4 (1-9) of 20180919ytt.wiff (Turbo Spray), subtracted (0.000 to 3.156 min), Smoothed, Centroided

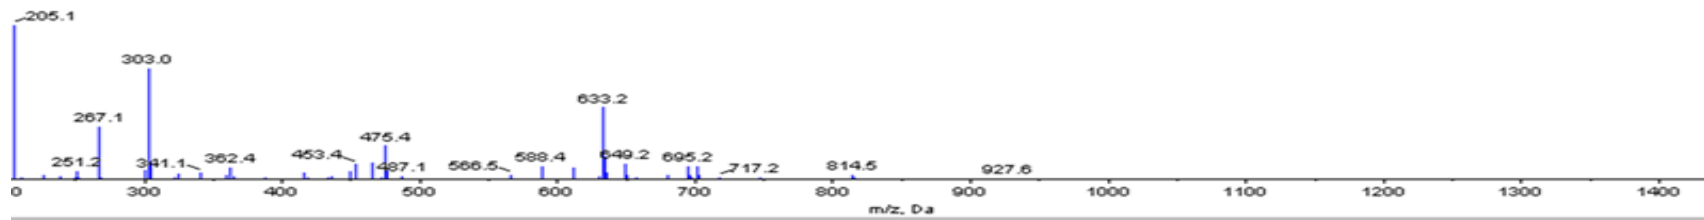

28.450 to 29.201 min from Sample 4 (1-9) of 20180919ytt.wiff (Turbo Spray), subtracted (0.000 to 3.156 min), Smoothed, Centroided

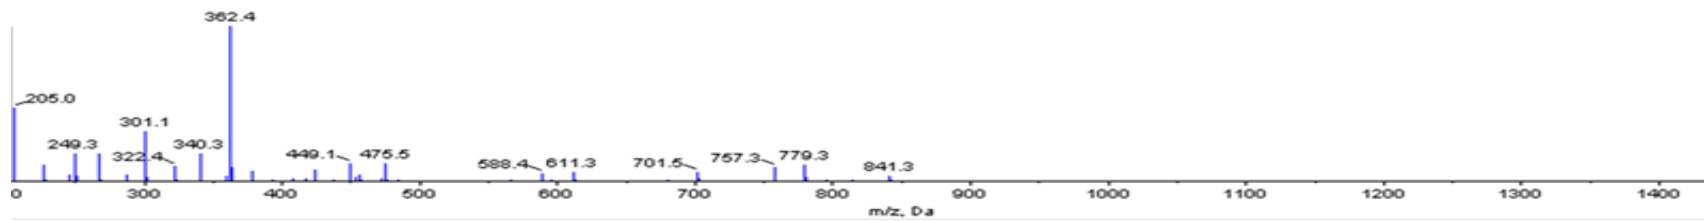

adzu LC Controller Detector A, Channel 1 from Sample 3 (2-2) of 20180919ytt.wiff

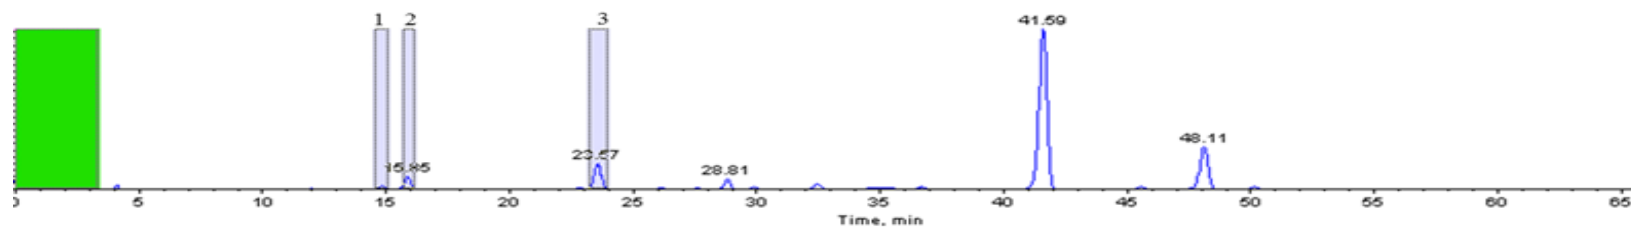

23.191 to 23.992 min from Sample 3 (2-2) of 20180919ytt.wiff (Turbo Spray), subtracted (0.000 to 3.356 min), Smoothed, Centroided

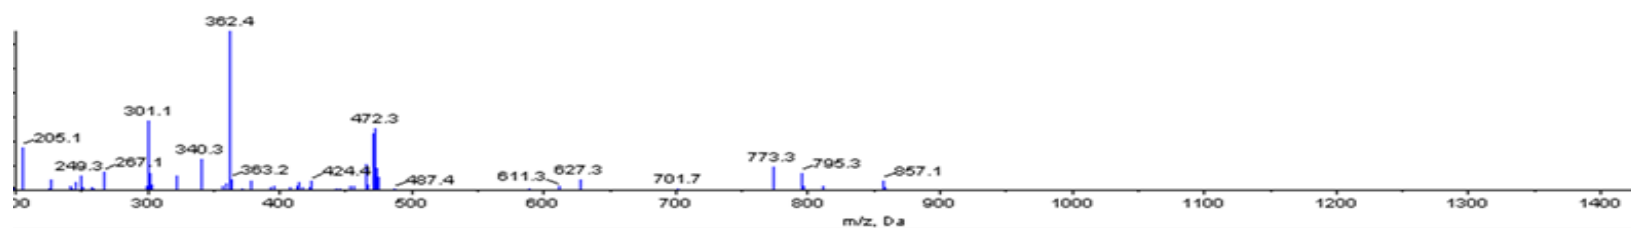

15.678 to 16.179 min from Sample 3 (2-2) of 20180919ytt.wiff (Turbo Spray), subtracted (0.000 to 3.356 min), Smoothed, Centroided

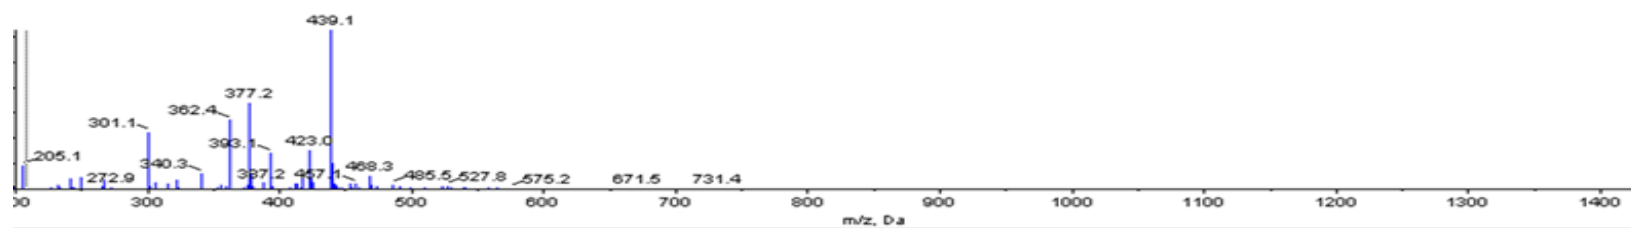

14.526 to 15.077 min from Sample 3 (2-2) of 20180919ytt.wiff (Turbo Spray), subtracted (0.000 to 3.356 min), Smoothed, Centroided

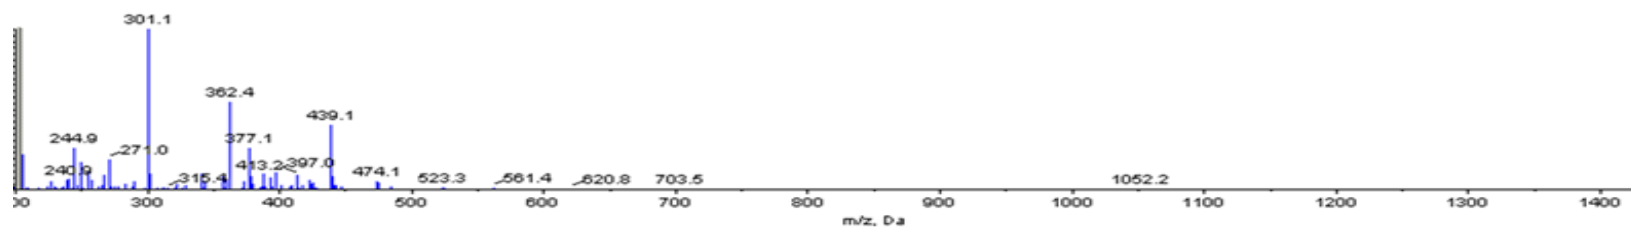

idzu LC Controller Detector A, Channel 1 from Sample 3 (2-2) of 20180919ytt.wiff

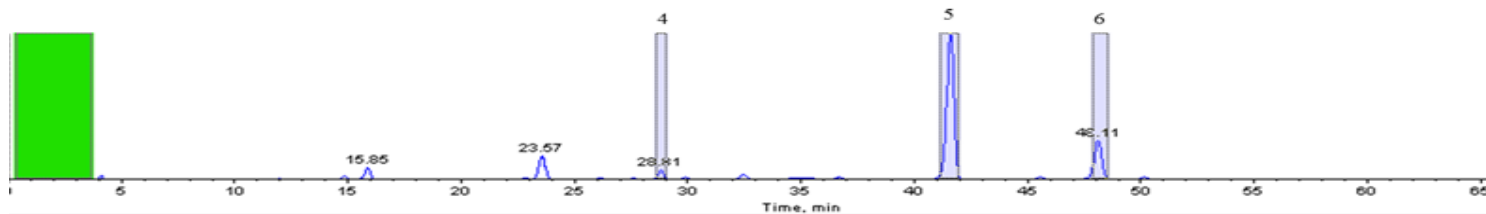

47.885 to 48.585 min from Sample 3 (2-2) of 20180919ytt.wiff (Turbo Spray), subtracted (0.351 to 3.707 min), Smoothed, Centroided

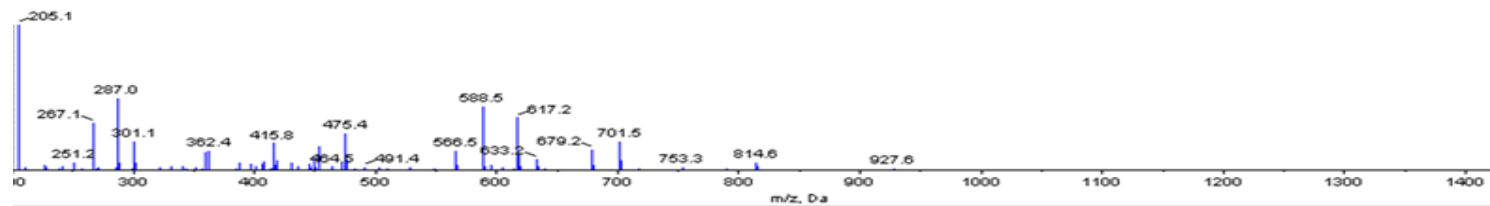

41.123 to 41.974 min from Sample 3 (2-2) of 20180919ytt.wiff (Turbo Spray), subtracted (0.351 to 3.707 min), Smoothed, Centroided

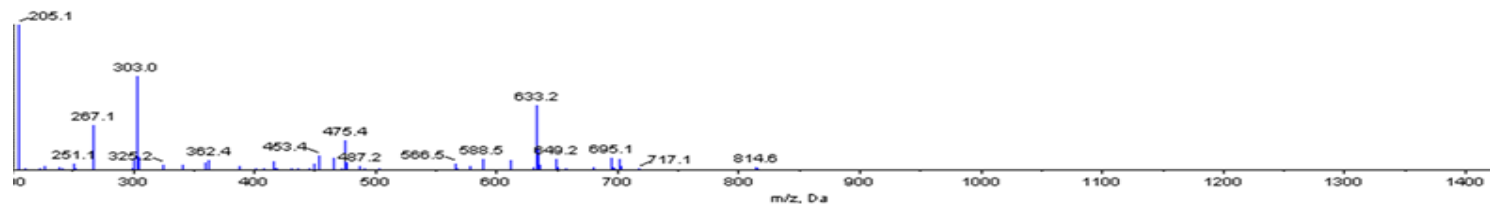

28.601 to 29.101 min from Sample 3 (2-2) of 20180919ytt.wiff (Turbo Spray), subtracted (0.351 to 3.707 min), Smoothed, Centroided

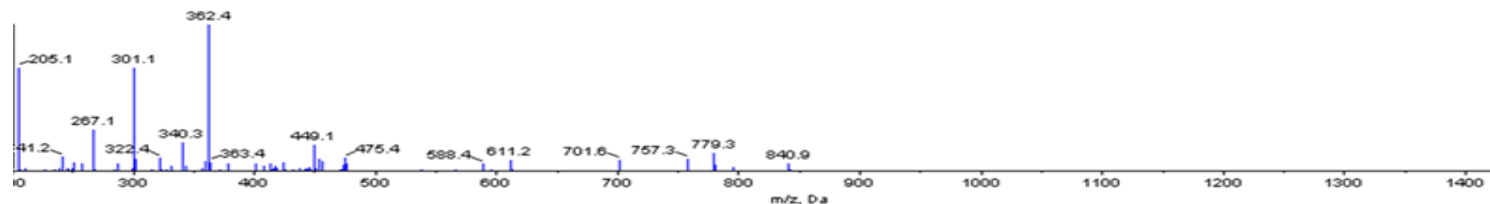

adzu LC Controller Detector A, Channel 1 from Sample 5 (2-10) of 20180919yftt.wiff

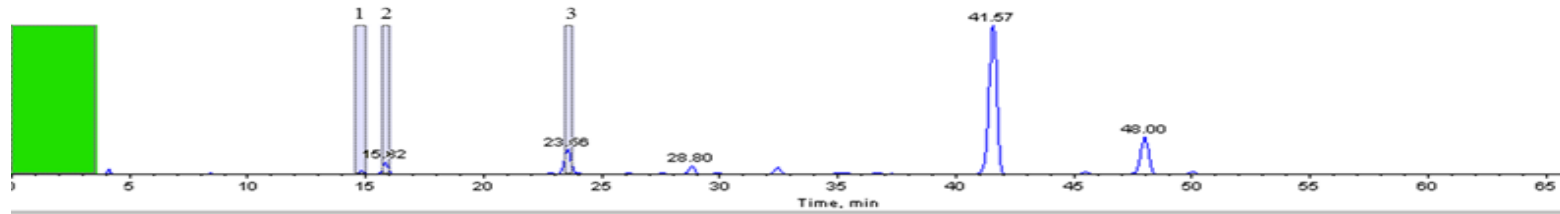

23.441 to 23.792 min from Sample 5 (2-10) of 20180919yftt.wiff (Turbo Spray), subtracted (0.000 to 3.556 min), Smoothed, Centroided

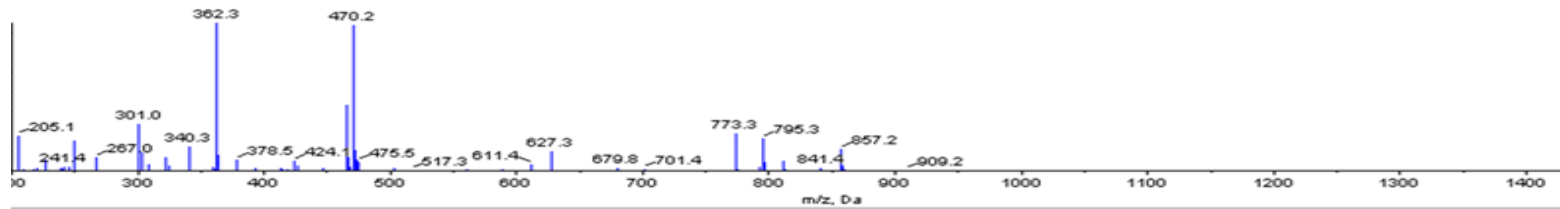

15.678 to 16.028 min from Sample 5 (2-10) of 20180919yftt.wiff (Turbo Spray), subtracted (0.000 to 3.556 min), Smoothed, Centroided

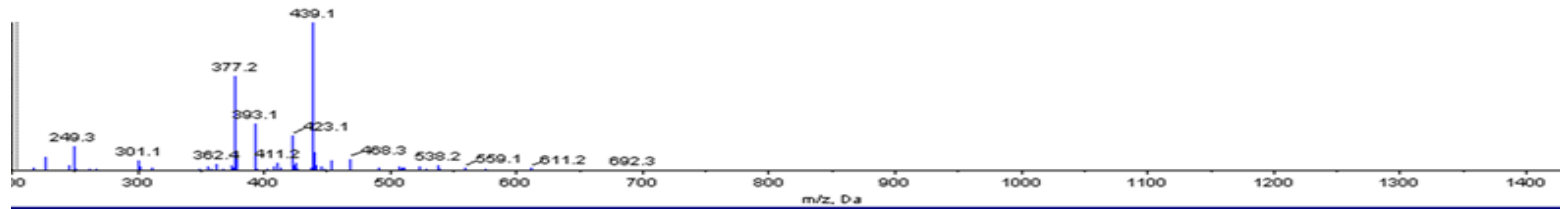

14.526 to 15.027 min from Sample 5 (2-10) of 20180919yftt.wiff (Turbo Spray), subtracted (0.000 to 3.556 min), Smoothed, Centroided

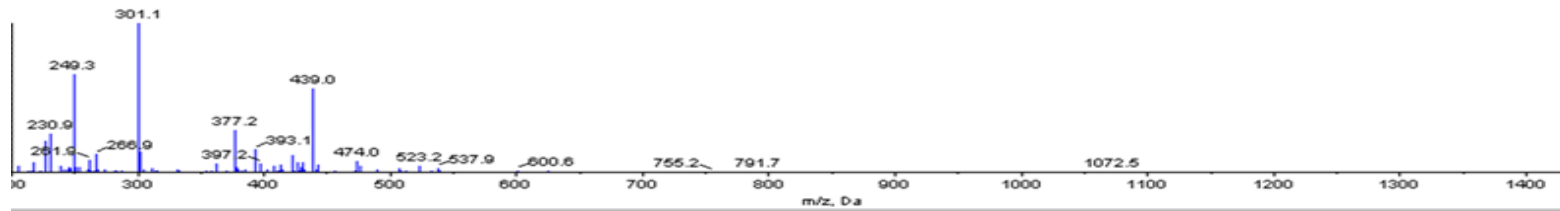



adzu LC Controller Detector A, Channel 1 from Sample 5 (2-10) of 20180919ytt.wiff

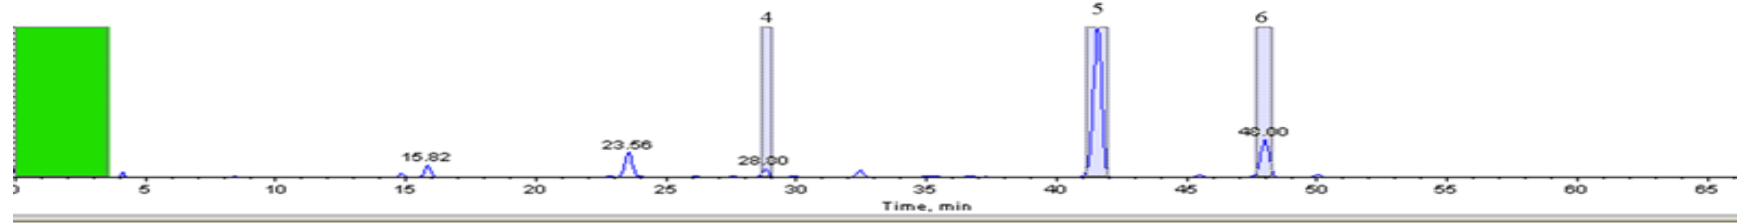

47.634 to 48.285 min from Sample 5 (2-10) of 20180919ytt.wiff (Turbo Spray), subtracted (0.000 to 3.556 min), Smoothed, Centroided

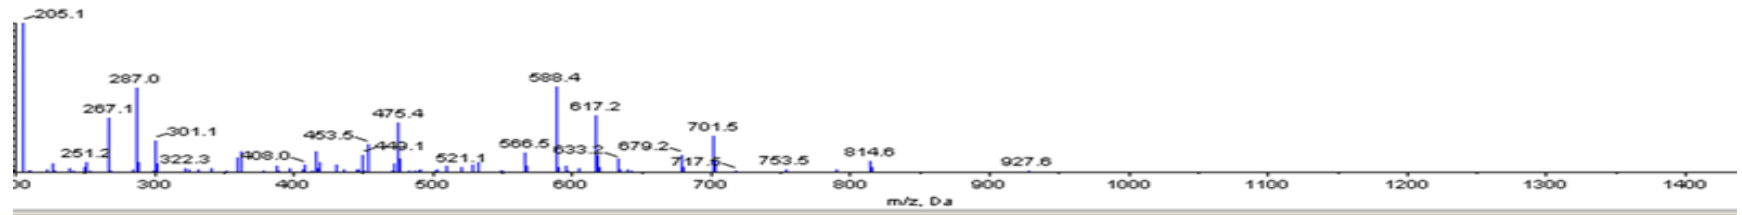

41.123 to 41.974 min from Sample 5 (2-10) of 20180919ytt.wiff (Turbo Spray), subtracted (0.000 to 3.556 min), Smoothed, Centroided

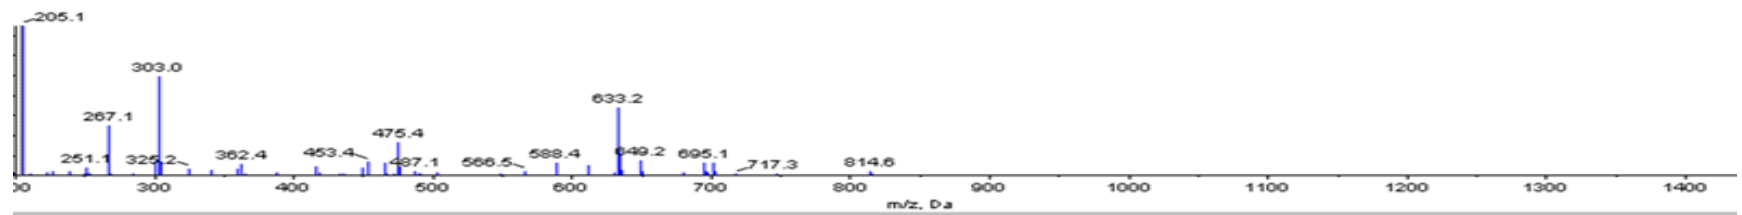

28.851 to 29.101 min from Sample 5 (2-10) of 20180919ytt.wiff (Turbo Spray), subtracted (0.000 to 3.556 min), Smoothed, Centroided

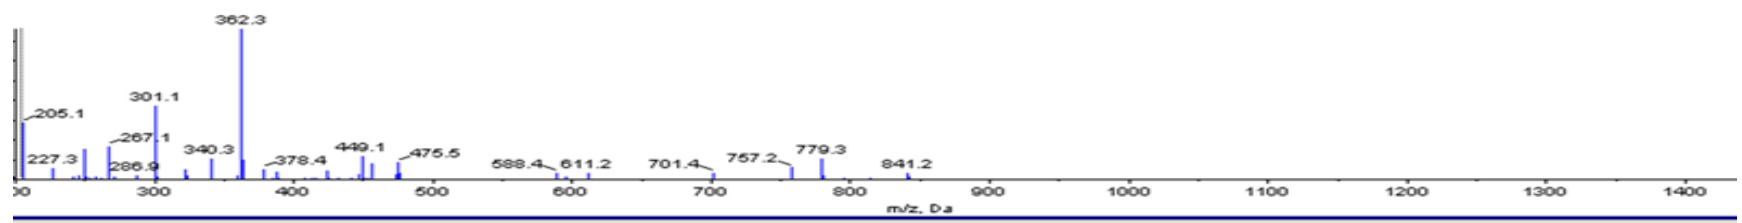

Supplement: f1 [file 1382604.f1.pdf]
